# Supplementary material for: Genetic Polymorphisms in Oxidative Stress and Inflammatory Pathways as Potential Biomarkers in Alzheimer’s Disease and Dementia
Source: MDPI journal article supplement (doi:10.3390/antiox12020316), 2023-01-29
Supplement: s1 [file s1]

**Table S1.** Genotype frequencies of selected polymorphisms.

| Gene           | SNP                  | Role        | Genotype | All subjects (N=150)<br>N (%) | MAF (controls) | pHWE (controls) |
|----------------|----------------------|-------------|----------|-------------------------------|----------------|-----------------|
| <i>SOD2</i>    | rs4880               | p.Ala16Val  | CC       | 35 (23.3)                     | 0.52           | 0.624           |
|                |                      |             | CT       | 75 (50)                       |                |                 |
|                |                      |             | TT       | 40 (26.7)                     |                |                 |
| <i>CAT</i>     | rs1001179            | c.-262C>T   | CC       | 99 (66)                       | 0.23           | 0.254           |
|                |                      |             | CT       | 40 (26.7)                     |                |                 |
|                |                      |             | TT       | 11 (7.3)                      |                |                 |
| <i>GPX1</i>    | rs1050450            | p.Pro198Leu | CC       | 71 (47.3)                     | 0.31           | 0.938           |
|                |                      |             | CT       | 64 (42.7)                     |                |                 |
|                |                      |             | TT       | 15 (10)                       |                |                 |
| <i>IL1B</i>    | rs1143623            | c.-1560G>C  | GG       | 85 (56.7)                     | 0.25           | 0.446           |
|                |                      |             | GC       | 46 (30.7)                     |                |                 |
|                |                      |             | CC       | 19 (12.7)                     |                |                 |
|                | rs16944 <sup>a</sup> | c.-598T>C   | TT       | 23 (15.3)                     | 0.69           | 0.938           |
|                |                      |             | TC       | 58 (38.7)                     |                |                 |
|                |                      |             | CC       | 69 (46)                       |                |                 |
|                | rs1071676            | c.*505G>C   | CC       | 87 (58)                       | 0.26           | 0.057           |
|                |                      |             | CG       | 49 (32.7)                     |                |                 |
|                |                      |             | GG       | 14 (9.3)                      |                |                 |
|                |                      |             | GG       | 89 (59.3)                     |                |                 |
| <i>MIR146A</i> | rs2910164            | n.60G>C     | GC       | 51 (34)                       | 0.22           | 0.964           |
|                |                      |             | CC       | 10 (6.7)                      |                |                 |
|                |                      |             | GG       | 53 (35.3)                     |                |                 |
| <i>IL6</i>     | rs1800795            | c.-174G>C   | GC       | 70 (46.7)                     | 0.44           | 0.354           |
|                |                      |             | CC       | 27 (18)                       |                |                 |
|                |                      |             | GG       | 114 (76)                      |                |                 |
| <i>TNF</i>     | rs1800629            | c.-308G>A   | GA       | 31 (20.7)                     | 0.17           | 0.482           |
|                |                      |             | AA       | 5 (3.3)                       |                |                 |
|                |                      |             | AA       | 69 (46)                       |                |                 |
| <i>CARD8</i>   | rs2043211            | p.Cys10Ter  | AT       | 66 (44)                       | 0.27           | 0.673           |
|                |                      |             | TT       | 15 (10)                       |                |                 |
|                |                      |             | CC       | 143 (95.3)                    |                |                 |
| <i>NLRP3</i>   | rs35829419           | p.Gln705Lys | CC       | 143 (95.3)                    | 0.03           | 0.793           |

|               |            |             |    |            |      |       |
|---------------|------------|-------------|----|------------|------|-------|
|               |            |             | CA | 7 (4.7)    |      |       |
|               |            |             | AA | 0          |      |       |
| <i>GSTP1</i>  | rs1695     | p.Ile105Val | AA | 64 (42.7)  | 0.32 | 0.793 |
|               |            |             | AG | 66 (44)    |      |       |
|               |            |             | GG | 20 (13.3)  |      |       |
|               | rs1138272  | p.Ala114Val | CC | 123 (82)   | 0.09 | 0.444 |
|               |            |             | CT | 25 (16.7)  |      |       |
|               |            |             | TT | 2 (1.3)    |      |       |
| <i>NOS1</i>   | rs2293054  | p.Ile734=   | AA | 81 (54)    | 0.20 | 0.046 |
|               |            |             | AG | 61 (40.7)  |      |       |
|               |            |             | GG | 8 (5.3)    |      |       |
|               | rs2682826  | c.*276G>A   | GG | 72 (48)    | 0.27 | 0.673 |
|               |            |             | GA | 65 (43.3)  |      |       |
|               |            |             | AA | 13 (8.7)   |      |       |
| <i>KEAP1</i>  | rs1048290  | p.Leu471=   | GG | 50 (33.3)  | 0.37 | 0.054 |
|               |            |             | GC | 77 (51.3)  |      |       |
|               |            |             | CC | 23 (15.3)  |      |       |
|               | rs9676881  | c.*548G>A   | GG | 50 (33.3)  | 0.38 | 0.035 |
|               |            |             | GA | 77 (51.3)  |      |       |
|               |            |             | AA | 23 (15.3)  |      |       |
| <i>NFE2L2</i> | rs6706649  | c.-767C>T   | CC | 118 (78.7) | 0.12 | 0.012 |
|               |            |             | CT | 27 (18)    |      |       |
|               |            |             | TT | 5 (3.3)    |      |       |
|               | rs6721961  | c.-733T>G   | GG | 113 (75.3) | 0.11 | 0.316 |
|               |            |             | GT | 36 (24)    |      |       |
|               |            |             | TT | 1 (0.7)    |      |       |
|               | rs35652124 | c.-769T>C   | TT | 60 (40)    | 0.42 | 0.274 |
|               |            |             | TC | 65 (43.3)  |      |       |
|               |            |             | CC | 25 (16.7)  |      |       |

<sup>a</sup>polymorphic allele more common in European populations

HWE: Hardy-Weinberg equilibrium; MAF: minor allele frequency; SNP: single-nucleotide polymorphism

**Table S2.** Comparison of genotype frequencies among patients with different types of dementia.

| Gene           | SNP       | Genotype | AD<br>N (%) | MCI<br>N (%) | MCI (NOT AD)<br>N (%) | P     |
|----------------|-----------|----------|-------------|--------------|-----------------------|-------|
| <i>SOD2</i>    | rs4880    | CC       | 12 (22.2)   | 4 (28.6)     | 4 (20)                | 0.321 |
|                |           | CT       | 25 (46.3)   | 7 (50)       | 14 (70)               |       |
|                |           | TT       | 17 (31.5)   | 3 (21.4)     | 2 (10)                |       |
|                |           | CT+TT    | 42 (77.8)   | 10 (71.4)    | 16 (80)               |       |
| <i>CAT</i>     | rs1001179 | CC       | 39 (72.2)   | 9 (64.3)     | 13 (65)               | 0.177 |
|                |           | CT       | 14 (25.9)   | 3 (21.4)     | 4 (20)                |       |
|                |           | TT       | 1 (1.9)     | 2 (14.3)     | 3 (15)                |       |
|                |           | CT+TT    | 15 (27.8)   | 5 (35.7)     | 7 (35)                |       |
| <i>GPX1</i>    | rs1050450 | CC       | 27 (50)     | 5 (35.7)     | 10 (50)               | 0.295 |
|                |           | CT       | 21 (38.9)   | 6 (42.9)     | 10 (50)               |       |
|                |           | TT       | 6 (11.1)    | 3 (21.4)     | 0                     |       |
|                |           | CT+TT    | 27 (50)     | 9 (54.3)     | 10 (50)               |       |
| <i>IL1B</i>    | rs1143623 | GG       | 31 (57.4)   | 7 (50)       | 11 (55)               | 0.378 |
|                |           | GC       | 12 (22.2)   | 5 (35.7)     | 8 (40)                |       |
|                |           | CC       | 11 (20.4)   | 2 (14.3)     | 1 (5)                 |       |
|                |           | GC+CC    | 23 (42.6)   | 7 (50)       | 9 (45)                |       |
|                | rs16944   | TT       | 12 (22.2)   | 2 (14.3)     | 3 (15)                | 0.434 |
|                |           | TC       | 17 (31.5)   | 8 (57.1)     | 6 (30)                |       |
|                |           | CC       | 25 (46.3)   | 4 (28.6)     | 11 (55)               |       |
|                |           | TC+CC    | 42 (77.8)   | 12 (85.7)    | 17 (85)               |       |
|                | rs1071676 | GG       | 32 (59.3)   | 8 (57.1)     | 10 (50)               | 0.790 |
|                |           | GC       | 17 (31.5)   | 6 (42.9)     | 8 (40)                |       |
|                |           | CC       | 5 (9.3)     | 0            | 2 (10)                |       |
|                |           | GC+CC    | 22 (40.8)   | 6 (42.9)     | 10 (50)               |       |
| <i>MIR146A</i> | rs2910164 | GG       | 31 (57.4)   | 6 (42.9)     | 14 (70)               | 0.242 |
|                |           | GC       | 18 (33.3)   | 8 (57.1)     | 4 (20)                |       |
|                |           | CC       | 5 (9.3)     | 0            | 2 (10)                |       |
|                |           | GC+CC    | 23 (42.6)   | 8 (57.1)     | 6 (30)                |       |
| <i>IL6</i>     | rs1800795 | GG       | 23 (42.6)   | 6 (42.9)     | 3 (15)                | 0.152 |
|                |           | GC       | 22 (40.7)   | 7 (50)       | 14 (70)               |       |
|                |           | CC       | 9 (16.7)    | 1 (7.1)      | 3 (15)                |       |

|       |            |         |           |           |          |                          |
|-------|------------|---------|-----------|-----------|----------|--------------------------|
| TNF   | rs1800629  | GC+CC   | 31 (57.4) | 8 (57.1)  | 17 (85)  | P <sub>dom</sub> = 0.076 |
|       |            | GG      | 44 (81.5) | 12 (85.7) | 16 (80)  | 0.443                    |
|       |            | GA      | 9 (16.7)  | 1 (7.1)   | 2 (10)   |                          |
|       |            | AA      | 1 (1.9)   | 1 (7.1)   | 2 (10)   |                          |
|       |            | GA+AA   | 10 (18.6) | 2 (14.2)  | 4 (20)   | P <sub>dom</sub> = 1.000 |
| CARD8 | rs2043211  | AA      | 25 (46.3) | 6 (42.9)  | 6 (30)   | 0.335                    |
|       |            | AT      | 25 (46.3) | 6 (42.9)  | 9 (45)   |                          |
|       |            | TT      | 4 (7.4)   | 2 (14.3)  | 5 (25)   |                          |
|       |            | AT+TT   | 29 (54.7) | 8 (57.2)  | 14 (70)  | P <sub>dom</sub> = 0.463 |
| NLRP3 | rs35829419 | CC      | 52 (96.3) | 13 (92.9) | 20 (100) | 0.513                    |
|       |            | CA      | 2 (3.7)   | 1 (7.1)   | 0        |                          |
| GSTP1 | rs1695     | AA      | 22 (40.7) | 6 (42.9)  | 8 (40)   | 1.000                    |
|       |            | AG      | 23 (42.6) | 6 (42.9)  | 9 (45)   |                          |
|       |            | GG      | 9 (16.7)  | 2 (14.3)  | 3 (15)   |                          |
|       |            | AG + GG | 32 (59.3) | 8 (57.2)  | 12 (60)  | P <sub>dom</sub> = 1.000 |
|       | rs1138272  | CC      | 47 (87)   | 10 (71.4) | 15 (75)  | 0.179                    |
|       |            | CT      | 7 (13)    | 3 (21.4)  | 4 (20)   |                          |
|       |            | TT      | 0         | 1 (7.1)   | 1 (5)    |                          |
|       |            | CT + TT | 7 (13)    | 4 (28.5)  | 5 (25)   | P <sub>dom</sub> = 0.254 |
| NOS1  | rs2293054  | AA      | 23 (42.6) | 8 (57.1)  | 13 (65)  | 0.359                    |
|       |            | AG      | 26 (48.1) | 4 (28.6)  | 6 (30)   |                          |
|       |            | GG      | 5 (9.3)   | 2 (14.3)  | 1 (5)    |                          |
|       |            | AG+GG   | 31 (57.4) | 6 (42.9)  | 7 (35)   | P <sub>dom</sub> = 0.190 |
|       | rs2682826  | GG      | 24 (44.4) | 5 (35.7)  | 11 (55)  | 0.349                    |
|       |            | GA      | 22 (40.7) | 9 (64.3)  | 8 (40)   |                          |
|       |            | AA      | 8 (14.8)  | 0         | 1 (5)    |                          |
|       |            | GA+AA   | 30 (55.5) | 9 (64.3)  | 9 (45)   | P <sub>dom</sub> = 0.540 |
| KEAP1 | rs1048290  | GG      | 18 (33.3) | 4 (28.5)  | 7 (35)   | 1.000                    |
|       |            | GC      | 25 (46.3) | 7 (50)    | 9 (45)   |                          |
|       |            | CC      | 11 (20.4) | 3 (21.4)  | 4 (20)   |                          |
|       |            | GC + CC | 36 (66.7) | 10 (71.4) | 13 (65)  | P <sub>dom</sub> = 1.000 |
|       | rs9676881  | GG      | 19 (35.2) | 4 (28.5)  | 7 (35)   | 0.996                    |
|       |            | GA      | 24 (44.4) | 7 (50)    | 9 (45)   |                          |
|       |            | AA      | 11 (20.4) | 3 (21.4)  | 4 (20)   |                          |
|       |            |         |           |           |          |                          |

|               |            |         |           |           |         |                                 |
|---------------|------------|---------|-----------|-----------|---------|---------------------------------|
| <i>NFE2L2</i> | rs6706649  | GA + AA | 35 (64.8) | 10 (71.4) | 13 (65) | P <sub>dom</sub> = 0.949        |
|               |            | CC      | 39 (72.2) | 11 (78.6) | 18 (90) | 0.312                           |
|               |            | CT      | 14 (25.9) | 2 (14.3)  | 2 (10)  |                                 |
|               |            | TT      | 1 (1.9)   | 1 (7.1)   | 0       |                                 |
|               |            | CT + TT | 15 (27.8) | 3 (21.4)  | 2 (10)  | P <sub>dom</sub> = 0.260        |
|               | rs6721961  | GG      | 43 (79.6) | 10 (71.4) | 12 (60) | 0.291                           |
|               |            | GT      | 10 (18.5) | 4 (28.5)  | 8 (40)  |                                 |
|               |            | TT      | 1 (1.9)   | 0         | 0       |                                 |
|               |            | GT + TT | 11 (20.4) | 4 (28.5)  | 8 (40)  | P <sub>dom</sub> = 0.241        |
|               | rs35652124 | TT      | 17 (31.5) | 10 (71.4) | 10 (50) | <b>0.043</b>                    |
|               |            | TC      | 30 (55.6) | 3 (21.4)  | 6 (30)  |                                 |
|               |            | CC      | 7 (12.9)  | 1 (7.1)   | 4 (20)  |                                 |
|               |            | TC + CC | 37 (68.5) | 4 (28.5)  | 10 (50) | P <sub>dom</sub> = <b>0.021</b> |

AD: Alzheimer's disease; MCI: mild cognitive impairment; SNP: single-nucleotide polymorphism

**Table S3.** Comparison of genotype frequencies among patients with AD and controls.

| Gene           | SNP       | Genotype | Controls<br>N (%) | AD<br>N (%) | OR (95 % CI)        | P            | OR <sub>adj</sub> (95 % CI) | P <sub>adj</sub> |
|----------------|-----------|----------|-------------------|-------------|---------------------|--------------|-----------------------------|------------------|
| <i>SOD2</i>    | rs4880    | CC       | 15 (24.2)         | 12 (22.2)   | Reference           |              | Reference                   |                  |
|                |           | CT       | 29 (46.8)         | 25 (46.3)   | 1.078 (0.426-2.727) | 0.875        | 1.295 (0.394-4.262)         | 0.670            |
|                |           | TT       | 18 (29)           | 17 (31.5)   | 1.181 (0.431-3.234) | 0.747        | 1.545 (0.439-5.432)         | 0.498            |
|                |           | CT+TT    | 47 (75.8)         | 42 (77.8)   | 1.117 (0.47-2.655)  | 0.802        | 1.399 (0.473-4.142)         | 0.544            |
| <i>CAT</i>     | rs1001179 | CC       | 38 (61.3)         | 39 (72.2)   | Reference           |              | Reference                   |                  |
|                |           | CT       | 19 (30.6)         | 14 (25.9)   | 0.718 (0.315-1.634) | 0.430        | 0.563 (0.194-1.64)          | 0.292            |
|                |           | TT       | 5 (8.1)           | 1 (1.9)     | 0.195 (0.022-1.746) | 0.144        | 0.105 (0.006-1.914)         | 0.128            |
|                |           | CT+TT    | 24 (38.7)         | 15 (27.8)   | 0.609 (0.278-1.335) | 0.215        | 0.465 (0.167-1.291)         | 0.141            |
| <i>GPX1</i>    | rs1050450 | CC       | 29 (46.8)         | 27 (50)     | Reference           |              | Reference                   |                  |
|                |           | CT       | 27 (43.5)         | 21 (38.9)   | 0.835 (0.385-1.812) | 0.649        | 0.71 (0.26-1.937)           | 0.504            |
|                |           | TT       | 6 (9.7)           | 6 (11.1)    | 1.074 (0.309-3.738) | 0.911        | 1.73 (0.28-10.688)          | 0.555            |
|                |           | CT+TT    | 33 (53.2)         | 27 (50)     | 0.879 (0.423-1.824) | 0.729        | 0.828 (0.323-2.124)         | 0.694            |
| <i>IL1B</i>    | rs1143623 | GG       | 36 (58.1)         | 31 (57.4)   | Reference           |              | Reference                   |                  |
|                |           | GC       | 21 (33.9)         | 12 (22.2)   | 0.664 (0.282-1.563) | 0.348        | 0.407 (0.133-1.242)         | 0.114            |
|                |           | CC       | 5 (8.1)           | 11 (20.4)   | 2.555 (0.8-8.159)   | 0.113        | 2.760 (0.561-13.571)        | 0.212            |
|                |           | GC+CC    | 26 (42)           | 23 (42.6)   | 1.027 (0.491-2.15)  | 0.943        | 0.728 (0.279-1.898)         | 0.516            |
|                | rs16944   | TT       | 6 (9.7)           | 12 (22.2)   | Reference           |              | Reference                   |                  |
|                |           | TC       | 27 (43.5)         | 17 (31.5)   | 0.315 (0.099-0.997) | <b>0.049</b> | 0.206 (0.046-0.924)         | <b>0.039</b>     |
|                |           | CC       | 29 (46.8)         | 25 (46.3)   | 0.431 (0.141-1.316) | 0.140        | 0.426 (0.100-1.818)         | 0.249            |
|                |           | TC+CC    | 56 (90.3)         | 42 (77.8)   | 0.375 (0.13-1.081)  | 0.069        | 0.307 (0.078-1.201)         | 0.090            |
|                | rs1071676 | CC       | 37 (59.7)         | 32 (59.3)   | Reference           |              | Reference                   |                  |
|                |           | CG       | 18 (29)           | 17 (31.5)   | 1.092 (0.484-2.466) | 0.832        | 0.945 (0.337-2.644)         | 0.914            |
|                |           | GG       | 7 (11.3)          | 5 (9.3)     | 0.826 (0.239-2.858) | 0.763        | 0.613 (0.117-3.21)          | 0.562            |
|                |           | CG+GG    | 25 (40.3)         | 22 (40.8)   | 1.017 (0.484-2.139) | 0.964        | 0.855 (0.331-2.208)         | 0.747            |
| <i>MIR146A</i> | rs2910164 | GG       | 38 (61.3)         | 31 (57.4)   | Reference           |              | Reference                   |                  |
|                |           | GC       | 21 (33.9)         | 18 (33.3)   | 1.051 (0.478-2.311) | 0.902        | 1.061 (0.385-2.919)         | 0.909            |
|                |           | CC       | 3 (4.8)           | 5 (9.3)     | 2.043 (0.452-9.229) | 0.353        | 8.102 (0.893-73.5)          | 0.063            |
|                |           | GC+CC    | 24 (38.7)         | 23 (42.6)   | 1.175 (0.559-2.47)  | 0.671        | 1.334 (0.51-3.493)          | 0.557            |
| <i>IL6</i>     | rs1800795 | GG       | 21 (33.9)         | 23 (42.6)   | Reference           |              | Reference                   |                  |
|                |           | GC       | 27 (43.5)         | 22 (40.7)   | 0.744 (0.329-1.683) | 0.478        | 0.572 (0.192-1.699)         | 0.314            |
|                |           | CC       | 14 (22.6)         | 9 (16.7)    | 0.587 (0.211-1.636) | 0.308        | 0.355 (0.088-1.422)         | 0.143            |

|               |            |         |           |           |                      |               |                       |              |
|---------------|------------|---------|-----------|-----------|----------------------|---------------|-----------------------|--------------|
|               |            | GC+CC   | 41 (66.1) | 31 (57.4) | 0.69 (0.325-1.466)   | 0.335         | 0.493 (0.181-1.348)   | 0.168        |
|               |            | GG      | 42 (67.7) | 44 (81.5) | Reference            |               | Reference             |              |
| <i>TNF</i>    | rs1800629  | GA      | 19 (30.6) | 9 (16.7)  | 0.452 (0.184-1.111)  | 0.083         | 0.238 (0.069-0.823)   | <b>0.023</b> |
|               |            | AA      | 1 (1.6)   | 1 (1.9)   | 0.955 (0.058-15.758) | 0.974         | 0.771 (0.002-374.434) | 0.934        |
|               |            | GA+AA   | 20 (32.2) | 10 (18.6) | 0.477 (0.2-1.138)    | 0.095         | 0.246 (0.072-0.84)    | <b>0.025</b> |
|               |            | AA      | 32 (51.6) | 25 (46.3) | Reference            |               | Reference             |              |
| <i>CARD8</i>  | rs2043211  | AT      | 26 (41.9) | 25 (46.3) | 1.231 (0.577-2.627)  | 0.592         | 0.617 (0.221-1.723)   | 0.357        |
|               |            | TT      | 4 (6.5)   | 4 (7.4)   | 1.28 (0.291-5.631)   | 0.744         | 0.763 (0.119-4.88)    | 0.775        |
|               |            | AT+TT   | 30 (48.4) | 29 (54.7) | 1.237 (0.596-2.57)   | 0.568         | 0.638 (0.238-1.708)   | 0.371        |
| <i>NLRP3</i>  | rs35829419 | CC      | 58 (93.5) | 52 (96.3) | Reference            |               | Reference             |              |
|               |            | CA      | 4 (6.5)   | 2 (3.7)   | 0.558 (0.098-3.172)  | 0.510         | 0.553 (0.049-6.29)    | 0.633        |
|               |            | AA      | 28 (45.2) | 22 (40.7) | Reference            |               | Reference             |              |
| <i>GSTP1</i>  | rs1695     | AG      | 28 (45.2) | 23 (42.6) | 1.045 (0.477-2.292)  | 0.912         | 1.182 (0.426-3.274)   | 0.748        |
|               |            | GG      | 6 (9.7)   | 9 (16.7)  | 1.909 (0.59-6.177)   | 0.280         | 2.285 (0.516-10.124)  | 0.276        |
|               |            | AG + GG | 34 (54.9) | 32 (59.3) | 1.198 (0.573-2.506)  | 0.632         | 1.376 (0.526-3.596)   | 0.515        |
|               | rs1138272  | CC      | 51 (82.3) | 47 (87)   | Reference            |               | Reference             |              |
|               |            | CT      | 11 (17.7) | 7 (13)    | 0.691 (0.247-1.929)  | 0.480         | 0.400 (0.104-1.542)   | 0.183        |
|               |            | AA      | 37 (59.7) | 23 (42.6) | Reference            |               | Reference             |              |
|               | rs2293054  | AG      | 25 (40.3) | 26 (48.1) | 1.673 (0.785-3.565)  | 0.182         | 1.949 (0.731-5.196)   | 0.182        |
|               |            | GG      | 0         | 5 (9.3)   | /                    | <b>0.012*</b> | /                     | /            |
| <i>NOS1</i>   |            | AG+GG   | 25 (40.3) | 31 (57.4) | 1.995 (0.951-4.183)  | 0.068         | 2.346 (0.893-6.166)   | 0.084        |
|               |            | GG      | 32 (51.6) | 24 (44.4) | Reference            |               | Reference             |              |
|               | rs2682826  | GA      | 26 (41.9) | 22 (40.7) | 1.128 (0.519-2.452)  | 0.761         | 0.910 (0.335-2.469)   | 0.853        |
|               |            | AA      | 4 (6.5)   | 8 (14.8)  | 2.667 (0.718-9.9)    | 0.143         | 1.518 (0.304-7.579)   | 0.611        |
|               |            | GA+AA   | 30 (48.4) | 30 (55.5) | 1.333 (0.641-2.773)  | 0.441         | 1.010 (0.394-2.589)   | 0.983        |
|               |            | GG      | 21 (33.9) | 18 (33.3) | Reference            |               | Reference             |              |
|               | rs1048290  | GC      | 36 (58.1) | 25 (46.3) | 0.81 (0.36-1.822)    | 0.611         | 0.392 (0.127-1.205)   | 0.102        |
|               |            | CC      | 5 (8)     | 11 (20.4) | 2.567 (0.75-8.785)   | 0.133         | 1.900 (0.374-9.648)   | 0.439        |
| <i>KEAP1</i>  |            | GC + CC | 41 (66.1) | 36 (66.7) | 1.024 (0.473-2.218)  | 0.951         | 0.553 (0.194-1.575)   | 0.267        |
|               |            | GG      | 20 (32.2) | 19 (35.2) | Reference            |               | Reference             |              |
|               | rs9676881  | GA      | 37 (59.7) | 24 (44.4) | 0.683 (0.303-1.537)  | 0.357         | 0.377 (0.124-1.152)   | 0.087        |
|               |            | AA      | 5 (8)     | 11 (20.4) | 2.316 (0.677-7.919)  | 0.181         | 1.85 (0.365-9.376)    | 0.458        |
|               |            | GA + AA | 42 (67.7) | 35 (64.8) | 0.877 (0.405-1.898)  | 0.739         | 0.531 (0.188-1.505)   | 0.234        |
| <i>NFE2L2</i> | rs6706649  | CC      | 50 (80.6) | 39 (72.2) | Reference            |               | Reference             |              |

|            |         |           |           |                     |       |                     |       |
|------------|---------|-----------|-----------|---------------------|-------|---------------------|-------|
|            | CT      | 9 (14.5)  | 14 (25.9) | 1.994 (0.782-5.086) | 0.148 | 2.701 (0.806-9.049) | 0.107 |
|            | TT      | 3 (4.8)   | 1 (1.9)   | 0.427 (0.043-4.269) | 0.469 | 0.181 (0.011-2.948) | 0.230 |
|            | CT + TT | 12 (19.3) | 15 (27.8) | 1.603 (0.673-3.813) | 0.286 | 1.808 (0.598-5.465) | 0.294 |
|            | GG      | 48 (77.4) | 43 (79.6) | Reference           |       | Reference           |       |
|            | GT + TT | 14 (22.6) | 11 (20.4) | 0.877 (0.36-2.137)  | 0.773 | 0.665 (0.219-2.016) | 0.471 |
| rs6721961  | TT      | 23 (37.1) | 17 (31.5) | Reference           |       | Reference           |       |
|            | TC      | 26 (41.9) | 30 (55.6) | 1.561 (0.689-3.537) | 0.286 | 1.213 (0.421-3.492) | 0.720 |
|            | CC      | 13 (21)   | 7 (12.9)  | 0.729 (0.24-2.216)  | 0.577 | 0.773 (0.195-3.063) | 0.714 |
|            | TC + CC | 39 (62.9) | 37 (68.5) | 1.284 (0.593-2.777) | 0.526 | 1.063 (0.398-2.84)  | 0.904 |
|            |         |           |           |                     |       |                     |       |
| rs35652124 | CT      | 9 (14.5)  | 14 (25.9) | 1.994 (0.782-5.086) | 0.148 | 2.701 (0.806-9.049) | 0.107 |
|            | TT      | 3 (4.8)   | 1 (1.9)   | 0.427 (0.043-4.269) | 0.469 | 0.181 (0.011-2.948) | 0.230 |
|            | CT + TT | 12 (19.3) | 15 (27.8) | 1.603 (0.673-3.813) | 0.286 | 1.808 (0.598-5.465) | 0.294 |
|            | GG      | 48 (77.4) | 43 (79.6) | Reference           |       | Reference           |       |
|            | GT + TT | 14 (22.6) | 11 (20.4) | 0.877 (0.36-2.137)  | 0.773 | 0.665 (0.219-2.016) | 0.471 |

\*calculated using Fisher's exact test

Adj: adjusted for *APOE* status and age; AD: Alzheimer's disease; CI: confidence interval; OR: odds ratio; SNP: single-nucleotide polymorphism



**Table S4.** Association of investigated polymorphisms with cerebrospinal fluid biomarkers among patients with AD.

| SNP                         | Genotype | A $\beta$ <sub>42</sub> (pg/ml) | P                       | A $\beta$ <sub>42/40</sub> ratio | P                               | Total tau (pg/ml)    | P                       | pTau (pg/ml)       | P                       |
|-----------------------------|----------|---------------------------------|-------------------------|----------------------------------|---------------------------------|----------------------|-------------------------|--------------------|-------------------------|
| <i>SOD2</i><br>rs4880       | CC       | 727.5 (590.8-791.8)             | 0.575                   | 0.06 (0.05-0.07)                 | 0.234                           | 733.5 (535.5-937.8)  | 0.777                   | 95.5 (84.8-113)    | 0.880                   |
|                             | CT       | 711 (531-791.5)                 |                         | 0.06 (0.04-0.07)                 |                                 | 782 (613-990)        |                         | 98 (84.5-126.5)    |                         |
|                             | TT       | 582 (534-742.5)                 |                         | 0.05 (0.03-0.06)                 |                                 | 806 (513-1093)       |                         | 100 (80-149)       |                         |
|                             | CT+TT    | 663.5 (536-776.8)               | P <sub>dom</sub> =0.454 | 0.06 (0.04-0.06)                 | P <sub>dom</sub> =0.482         | 792 (574.8-1014.8)   | P <sub>dom</sub> =0.662 | 99 (81-128)        | P <sub>dom</sub> =0.692 |
| <i>CAT</i><br>rs1001179     | CC       | 658 (530-770)                   |                         | 0.06 (0.04-0.07)                 |                                 | 778 (549-1013)       |                         | 98 (81-128)        |                         |
|                             | CT+TT    | 725 (570-800)                   | P <sub>dom</sub> =0.227 | 0.06 (0.05-0.06)                 | P <sub>dom</sub> =0.575         | 763 (576-969)        | P <sub>dom</sub> =0.946 | 97 (81-117)        | P <sub>dom</sub> =0.395 |
| <i>GPX1</i><br>rs1050450    | CC       | 695 (539-785)                   | 0.285                   | 0.05 (0.04-0.07)                 | 0.955                           | 748 (571-967)        | 0.461                   | 98 (81-128)        | 0.678                   |
|                             | CT       | 669 (520.5-753.5)               |                         | 0.06 (0.05-0.06)                 |                                 | 855 (625.5-1085.5)   |                         | 110 (83-133.5)     |                         |
|                             | TT       | 758.5 (627-820)                 |                         | 0.06 (0.05-0.06)                 |                                 | 696.5 (436.8-945)    |                         | 91 (67.8-128)      |                         |
|                             | CT+TT    | 688 (538-770)                   | P <sub>dom</sub> =0.762 | 0.06 (0.05-0.06)                 | P <sub>dom</sub> =0.763         | 844 (549-1020)       | P <sub>dom</sub> =0.586 | 98 (79-124)        | P <sub>dom</sub> =0.762 |
| <i>IL1B</i><br>rs1143623    | GG       | 718 (570-799)                   | 0.280                   | 0.06 (0.05-0.07)                 | 0.542                           | 763 (571-1035)       | 0.811                   | 97 (81-140)        | 0.901                   |
|                             | GC       | 645.5 (532.3-722)               |                         | 0.06 (0.04-0.06)                 |                                 | 811.5 (562-1032.5)   |                         | 106 (84.8-128)     |                         |
|                             | CC       | 602 (504-785)                   |                         | 0.05 (0.04-0.07)                 |                                 | 750 (521-967)        |                         | 98 (79-123)        |                         |
|                             | GC+CC    | 638 (523-758)                   | P <sub>dom</sub> =0.113 | 0.05 (0.04-0.06)                 | P <sub>dom</sub> =0.269         | 802 (549-969)        | P <sub>dom</sub> =0.896 | 98 (84-125)        | P <sub>dom</sub> =0.979 |
| <i>IL1B</i><br>rs16944      | TT       | 574 (505.8-778.5)               | <b>0.038</b>            | 0.05 (0.04-0.06)                 | 0.102                           | 683.5 (521.8-944.8)  | 0.305                   | 97.5 (75.3-121.5)  | 0.196                   |
|                             | TC       | 638 (526.5-726)                 |                         | 0.05 (0.04-0.06)                 |                                 | 821 (605-1224.5)     |                         | 114 (89.5-145.5)   |                         |
|                             | CC       | 748 (584.5-808.5)               |                         | 0.06 (0.05-0.07)                 |                                 | 748 (551-902.5)      |                         | 95 (81-125)        |                         |
|                             | TC+CC    | 701 (556.5-777.5)               | P <sub>dom</sub> =0.328 | 0.06 (0.05-0.07)                 | P <sub>dom</sub> =0.580         | 780 (588.3-1036)     | P <sub>dom</sub> =0.349 | 98 (83.3-131)      | P <sub>dom</sub> =0.417 |
| <i>IL1B</i><br>rs1071676    | GG       | 655.5 (527-743)                 | 0.061                   | 0.05 (0.04-0.07)                 | 0.205                           | 756.5 (572.3-1029.5) | 0.950                   | 99 (82.5-134.8)    | 0.474                   |
|                             | GC       | 748 (534-794)                   |                         | 0.06 (0.05-0.06)                 |                                 | 782 (537-994.5)      |                         | 89 (81-115.5)      |                         |
|                             | CC       | 799 (714.5-952)                 |                         | 0.06 (0.06-0.07)                 |                                 | 719 (620-883)        |                         | 97 (92.5-116.5)    |                         |
|                             | GC+CC    | 753 (562-804.3)                 | P <sub>dom</sub> =0.088 | 0.06 (0.06-0.06)                 | P <sub>dom</sub> =0.199         | 780 (544.5-925.5)    | P <sub>dom</sub> =0.765 | 96 (81-114.8)      | P <sub>dom</sub> =0.260 |
| <i>MIR146A</i><br>rs2910164 | GG       | 669 (530-759)                   | 0.540                   | 0.06 (0.04-0.06)                 | <b>0.033</b>                    | 763 (515-1151)       | 0.947                   | 98 (79-140)        | 0.933                   |
|                             | GC       | 703 (579-804.3)                 |                         | 0.07 (0.06-0.07)                 |                                 | 765 (599.3-925)      |                         | 97 (85.5-123.5)    |                         |
|                             | CC       | 653 (574.5-855.5)               |                         | 0.05 (0.04-0.07)                 |                                 | 844 (665.5-875)      |                         | 98 (92.5-123.5)    |                         |
|                             | GC+CC    | 695 (582-800)                   | P <sub>dom</sub> =0.267 | 0.06 (0.05-0.07)                 | P <sub>dom</sub> = <b>0.043</b> | 782 (609-894)        | P <sub>dom</sub> =0.773 | 98 (88-123)        | P <sub>dom</sub> =0.875 |
| <i>IL6</i><br>rs1800795     | GG       | 731 (523-785)                   | 0.832                   | 0.06 (0.05-0.06)                 | 0.894                           | 719 (521-967)        | 0.423                   | 97 (79-123)        | 0.558                   |
|                             | GC       | 691.5 (539.8-758.3)             |                         | 0.06 (0.04-0.07)                 |                                 | 813.5 (594.8-1067)   |                         | 103.5 (85.5-132.8) |                         |
|                             | CC       | 658 (538.5-855.5)               |                         | 0.06 (0.03-0.08)                 |                                 | 750 (555.5-953.5)    |                         | 97 (86.5-143)      |                         |
|                             | GC+CC    | 669 (539-759)                   | P <sub>dom</sub> =0.618 | 0.06 (0.04-0.07)                 | P <sub>dom</sub> =0.732         | 802 (601-1035)       | P <sub>dom</sub> =0.298 | 100 (87-128)       | P <sub>dom</sub> =0.282 |
| <i>TNF</i><br>rs1800629     | GG       | 701 (532.3-773)                 |                         | 0.06 (0.04-0.06)                 |                                 | 813.5 (572.3-1018.3) |                         | 108.5 (81.8-128)   |                         |
|                             | GA       | 669 (556.5-797.5)               |                         | 0.06 (0.05-0.08)                 |                                 | 617 (499-736)        |                         | 92 (75.5-97.5)     |                         |

|                     |         |                     |                         |                  |                         |                     |                         |                   |                         |
|---------------------|---------|---------------------|-------------------------|------------------|-------------------------|---------------------|-------------------------|-------------------|-------------------------|
| CARD8<br>rs2043211  | GA+AA   | 678.5 (565.8-796.3) | P <sub>dom</sub> =0.824 | 0.06 (0.05-0.08) | P <sub>dom</sub> =0.187 | 613 (500.5-729)     | P <sub>dom</sub> =0.058 | 90.5 (76.3-97.3)  | P <sub>dom</sub> =0.086 |
|                     | AA      | 688 (538.5-797)     | 0.742                   | 0.06 (0.05-0.06) | 0.560                   | 782 (605-925)       | 0.980                   | 98 (85.5-128)     | 0.919                   |
|                     | AT      | 602 (536.5-766)     |                         | 0.06 (0.05-0.07) |                         | 750 (528-1016.5)    |                         | 98 (79-131)       |                         |
|                     | TT      | 740.5 (511.8-778.8) |                         | 0.04 (0.03-0.07) |                         | 667 (533.5-1616.5)  |                         | 94 (71.3-208.3)   |                         |
|                     | AT+TT   | 707 (536.5-767)     | P <sub>dom</sub> =0.515 | 0.06 (0.04-0.07) | P <sub>dom</sub> =0.850 | 750 (528-1016.5)    | P <sub>dom</sub> =0.924 | 98 (79-131)       | P <sub>dom</sub> =0.735 |
| NLRP3<br>rs35829419 | CC      | 691.5 (540-773)     | 1.000                   | 0.06 (0.05-0.06) | 0.633                   | 770.5 (554.5-968.5) | 0.453                   | 98 (81-127.3)     | 0.314                   |
|                     | CA      | 715.5 (441-990)     |                         | 0.05 (0.04-0.06) |                         | 1003.5 (709-1298)   |                         | 143.5 (97-190)    |                         |
| GSTP1<br>rs1695     | AA      | 655.5 (526-771)     | 0.648                   | 0.06 (0.05-0.07) | 0.066                   | 734.5 (544.5-984)   | 0.429                   | 94.5 (82.8-138.8) | 0.125                   |
|                     | AG      | 721 (539-795)       |                         | 0.05 (0.03-0.06) |                         | 821 (601-1039)      |                         | 114 (87-128)      |                         |
|                     | GG      | 638 (553.5-765)     |                         | 0.06 (0.06-0.07) |                         | 748 (519.5-825)     |                         | 96 (76.5-98)      |                         |
|                     | AG + GG | 701 (543.8-793.3)   | P <sub>dom</sub> =0.418 | 0.06 (0.04-0.06) | P <sub>dom</sub> =0.328 | 792 (578.5-1002)    | P <sub>dom</sub> =0.725 | 99 (81-124.8)     | P <sub>dom</sub> =0.641 |
| GSTP1<br>rs1138272  | CC      | 658 (530-774)       |                         | 0.06 (0.04-0.06) |                         | 778 (571-969)       |                         | 98 (81-128)       |                         |
|                     | CT + TT | 695 (669-885)       | P <sub>dom</sub> =0.242 | 0.07 (0.05-0.07) | P <sub>dom</sub> =0.241 | 617 (525-1039)      | P <sub>dom</sub> =0.632 | 98 (81-128)       | P <sub>dom</sub> =0.960 |
| NOS1<br>rs2293054   | AA      | 707 (504-774)       | 0.547                   | 0.06 (0.04-0.06) | 0.801                   | 782 (594-1035)      | 0.542                   | 110 (81-144)      | 0.514                   |
|                     | AG      | 716 (536-791)       |                         | 0.06 (0.05-0.06) |                         | 679.5 (544.5-898.3) |                         | 95.5 (80-123.5)   |                         |
|                     | GG      | 602 (553.5-666.5)   |                         | 0.06 (0.05-0.07) |                         | 844 (665-1003)      |                         | 98 (85.5-132.5)   |                         |
|                     | AG+GG   | 688 (543-785)       | P <sub>dom</sub> =0.773 | 0.06 (0.05-0.06) | P <sub>dom</sub> =0.827 | 748 (549-911)       | P <sub>dom</sub> =0.490 | 97 (81-125)       | P <sub>dom</sub> =0.319 |
| NOS1<br>rs2682826   | GG      | 588 (505.8-798)     | 0.237                   | 0.06 (0.04-0.06) | 0.818                   | 776 (598.8-950.3)   | 0.344                   | 99 (88.5-127)     | 0.415                   |
|                     | GA      | 736 (649.3-785.8)   |                         | 0.06 (0.05-0.07) |                         | 748 (560-928.5)     |                         | 94 (81-119.5)     |                         |
|                     | AA      | 588.5 (547.5-707)   |                         | 0.06 (0.04-0.07) |                         | 939 (578-1208.5)    |                         | 125 (82.3-147.5)  |                         |
|                     | GA+AA   | 703 (571.5-771)     | P <sub>dom</sub> =0.296 | 0.06 (0.05-0.07) | P <sub>dom</sub> =0.642 | 770.5 (543-1018.5)  | P <sub>dom</sub> =0.767 | 97 (81-130.3)     | P <sub>dom</sub> =0.702 |
| KEAP1<br>rs1048290  | GG      | 671 (545.3-800.5)   | 0.286                   | 0.06 (0.05-0.06) | 0.348                   | 750 (529.3-1050.8)  | 0.668                   | 99 (82.3-128.8)   | 0.860                   |
|                     | GC      | 669 (521.5-728)     |                         | 0.06 (0.04-0.07) |                         | 802 (597.5-968)     |                         | 98 (84-128)       |                         |
|                     | CC      | 747 (653-799)       |                         | 0.05 (0.04-0.06) |                         | 617 (515-1020)      |                         | 92 (77-128)       |                         |
|                     | GC + CC | 691.5 (532-758.8)   | P <sub>dom</sub> =0.430 | 0.06 (0.04-0.06) | P <sub>dom</sub> =0.440 | 772.5 (580.5-968.5) | P <sub>dom</sub> =0.898 | 97.5 (81-128)     | P <sub>dom</sub> =0.826 |
| KEAP1<br>rs9676881  | GG      | 748 (546-800)       | 0.168                   | 0.06 (0.05-0.06) | 0.339                   | 722 (531-1013)      | 0.622                   | 98 (84-125)       | 0.848                   |
|                     | GA      | 653.5 (517.3-724)   |                         | 0.06 (0.04-0.07) |                         | 811.5 (595.8-968.5) |                         | 102.5 (82.5-128)  |                         |
|                     | AA      | 747 (653-799)       |                         | 0.05 (0.04-0.06) |                         | 617 (515-1020)      |                         | 92 (77-128)       |                         |
|                     | GA + AA | 688 (530-758)       | P <sub>dom</sub> =0.265 | 0.06 (0.04-0.07) | P <sub>dom</sub> =0.390 | 782 (576-969)       | P <sub>dom</sub> =0.807 | 98 (81-128)       | P <sub>dom</sub> =0.964 |
| NFE2L2<br>rs6706649 | CC      | 695 (546-788)       |                         | 0.06 (0.04-0.06) |                         | 763 (571-969)       |                         | 97 (81-128)       |                         |
|                     | CT + TT | 669 (511-748)       | P <sub>dom</sub> =0.311 | 0.06 (0.05-0.07) | P <sub>dom</sub> =0.373 | 778 (525-1035)      | P <sub>dom</sub> =0.794 | 110 (81-155)      | P <sub>dom</sub> =0.445 |
| NFE2L2<br>rs6721961 | GG      | 695 (546-788)       |                         | 0.06 (0.05-0.07) |                         | 782 (601-1020)      |                         | 98 (87-128)       |                         |
|                     | GT + TT | 653 (513-747)       | P <sub>dom</sub> =0.361 | 0.06 (0.03-0.06) | P <sub>dom</sub> =0.756 | 594 (474-821)       | P <sub>dom</sub> =0.063 | 88 (79-128)       | P <sub>dom</sub> =0.259 |
|                     | TT      | 718 (572.5-808)     | 0.693                   | 0.06 (0.05-0.07) | 0.349                   | 782 (563-1003)      | 0.928                   | 98 (81-132.5)     | 0.940                   |

|                             |         |                 |                         |                  |                         |                     |                         |                 |                         |
|-----------------------------|---------|-----------------|-------------------------|------------------|-------------------------|---------------------|-------------------------|-----------------|-------------------------|
| <i>NFE2L2</i><br>rs35652124 | TC      | 655.5 (536-771) |                         | 0.06 (0.04-0.06) |                         | 770.5 (544.5-938.3) |                         | 99 (83.3-125)   |                         |
|                             | CC      | 759 (523-788)   |                         | 0.06 (0.05-0.06) |                         | 748 (571-1013)      |                         | 96 (81-125)     |                         |
|                             | TC + CC | 658 (534-772)   | P <sub>dom</sub> =0.451 | 0.06 (0.04-0.06) | P <sub>dom</sub> =0.162 | 763 (560-991)       | P <sub>dom</sub> =0.801 | 98 (82.5-124.5) | P <sub>dom</sub> =0.963 |

Aβ: amyloid β; AD: Alzheimer’s disease; SNP: single-nucleotide polymorphism
